# Supplementary material for: The Toxicological Analysis and Toxicological Risk Assessment of Chosen Elemental Impurities (Ag, Au, Co, Cr, Cs, Li, Mo, Se, and Sr) in Green Tea (Camellia sinensis (L.)) Infusions
Source: MDPI journal article supplement (doi:10.3390/nu15061460), 2023-03-17
Supplement: s1 [file s1]

## Supplementary Materials 1 (SM1)

### *The Analytical Calibration Strategy and Quality Control*

To ensure adequate quality standards, an appropriate calibration strategy and a quality control approach have been developed. The quantitative analysis of the elements in the infusion samples investigated is carried out using an analytical calibration method (calibration curves) obtained by diluting the stock standards of the elements studied (1:100 – 1:10000). Ag, Au, Cd, Cs, Pb, and Sr concentrations ( $n = 5$ ) were 0.0, 1.0, 2.0, 5.0, 10.0 mg/L, Co, Cr, Li and Mo concentrations were 0.0, 2.0, 4.0, 10.0, 20.0 mg/L. Se standard solutions were prepared, 10.0, 20.0, 50.0, and 100.0 g/L and were applied for the analytical calibration procedure. The coefficients obtained ( $0.996 < R < 0.999$ ) show that the analysis is accurate and precise. Table S1 shows a summary of the analytical calibration strategy and quality control results.

**Table S1.** The summary of analytical calibration strategy and quality control results.

| Analyte | Calibration Function |          | R       | Recovery, %  |
|---------|----------------------|----------|---------|--------------|
|         | Sigma A              | Slope    |         |              |
| Ag      | 49.3241              | 3141.38  | 0.99986 | $98 \pm 1.0$ |
| Au      | 4.45668              | 69.3612  | 0.99586 | $97 \pm 1.3$ |
| Co      | 10.066               | 8651.94  | 0.99999 | $99 \pm 0.7$ |
| Cs      | 46.851               | 14,413.5 | 0.99988 | $97 \pm 1.5$ |
| Li      | 3.80757              | 1006.25  | 0.99998 | $98 \pm 1.1$ |
| Mo      | 23.9563              | 3380.03  | 0.99992 | $97 \pm 1.5$ |
| Se      | 0.79798              | 153.457  | 0.99996 | $97 \pm 1.3$ |
| Sr      | 115.175              | 16,393.8 | 0.99992 | $96 \pm 1.6$ |
